# Supplementary material for: Creation of Stable Heterothallic Strains of Komagataella phaffii Enables Dissection of Mating Gene Regulation
Source: PubMed Central journal article supplement (PMC5748462; doi:10.1128/mcb.00398-17), 2017-12-29
Supplement: MCB.00398-17_zmb002181679s1.pdf [file MCB.00398-17_zmb002181679s1.pdf]

# Creation of stable heterothallic strains of *Komagataella phaffii* enables dissection of mating gene regulation

Lina Heistingner, Brigitte Gasser, Diethard Mattanovich

Supplemental material

FIG S1 Mating plates.

A

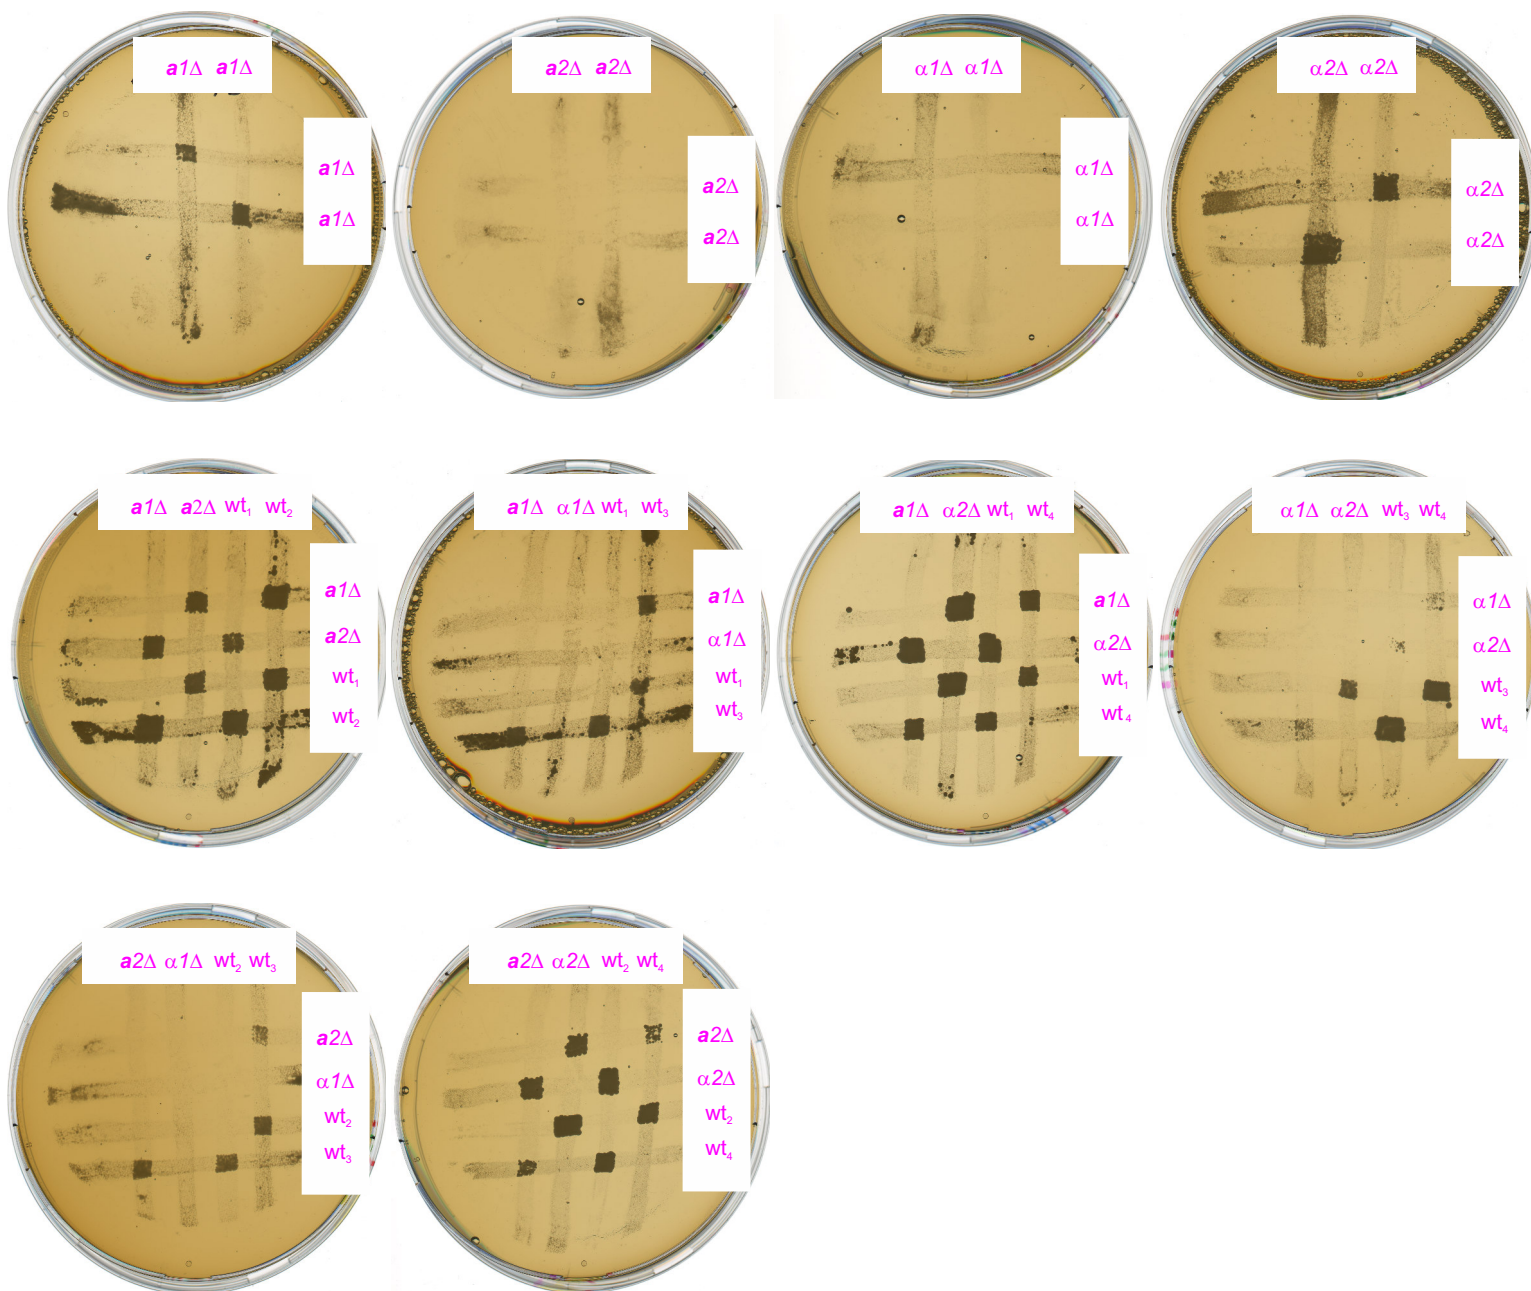

B

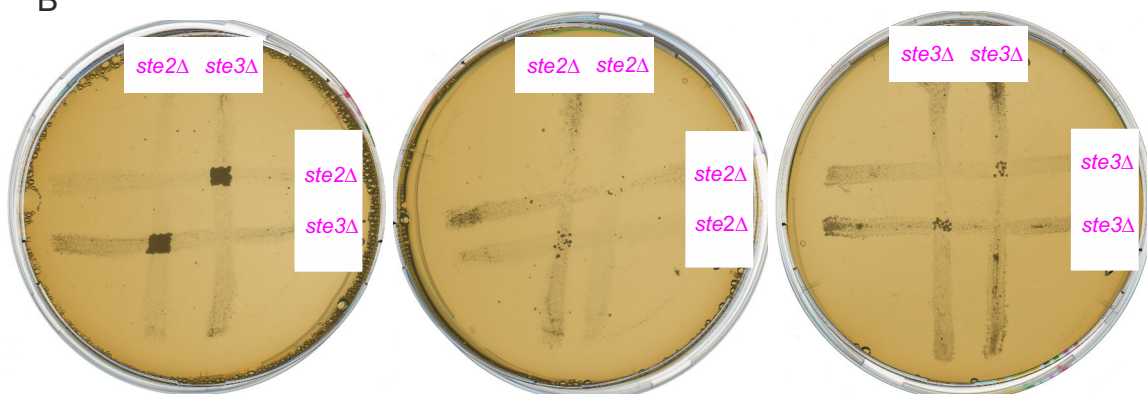

C

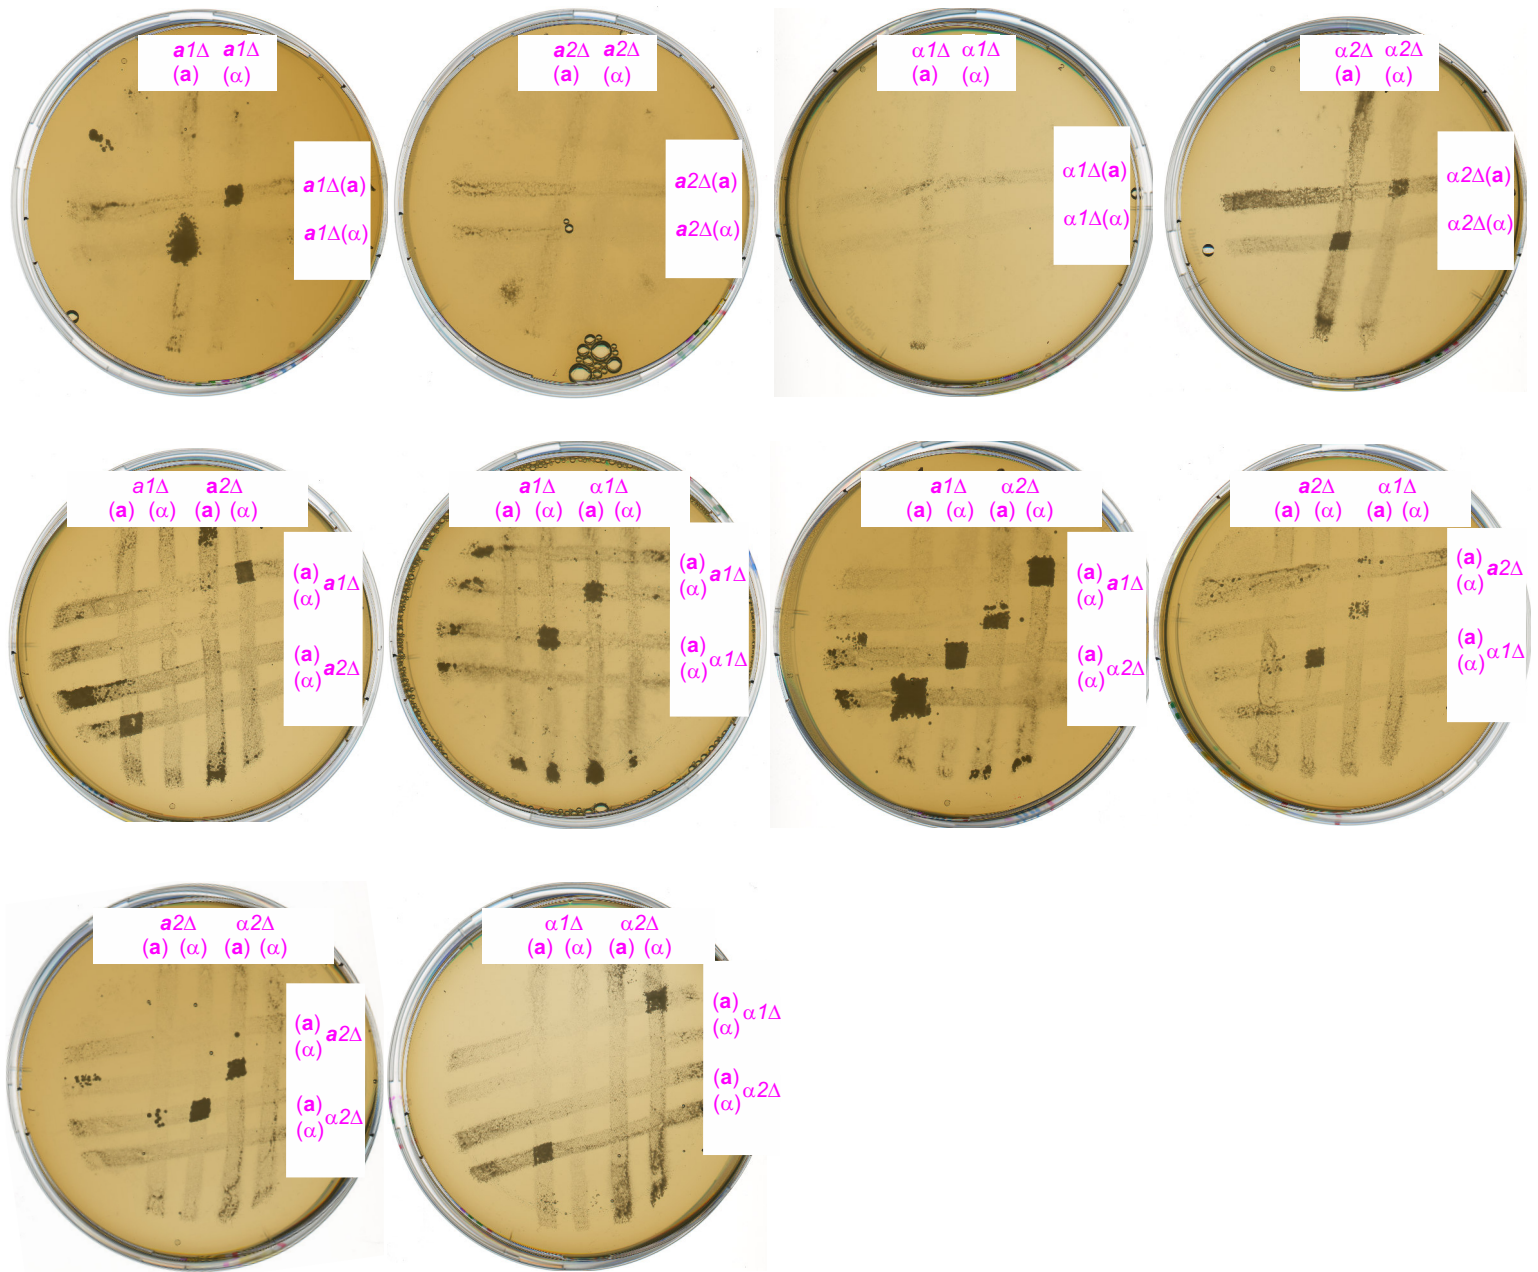

D

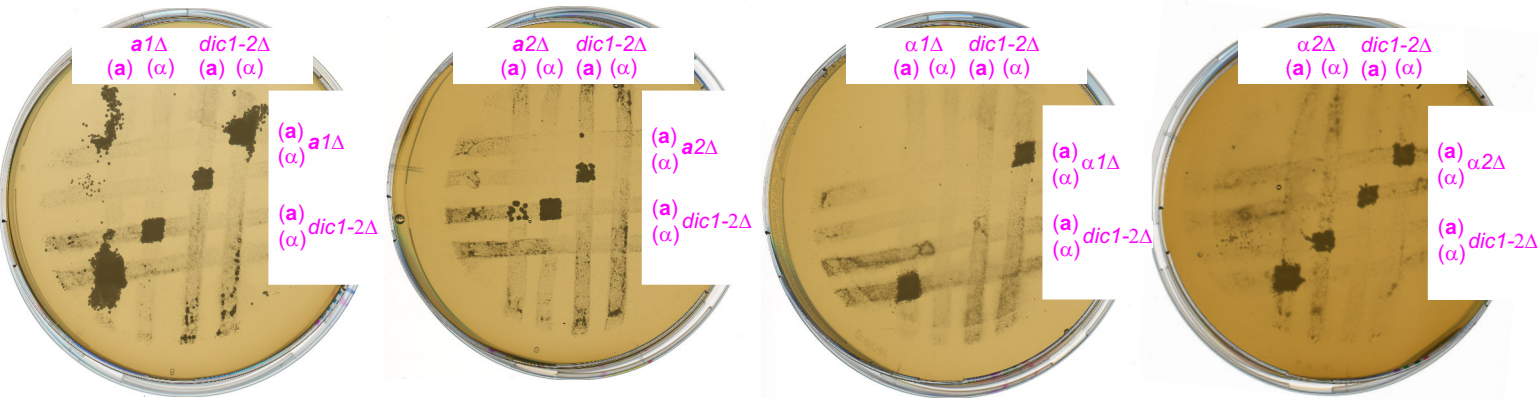

**FIG S1** Mating plates. To analyse the effect of different mutations, strains were crossed on mating agar and replicated onto selective agar plates to evaluate diploid cell formation. Representative images of all tested combinations are shown. To cross two strains with the same mutation, additional marker genes were integrated for selection. (A) Mating of homothallic *matΔ* strains with each other and the wildtype. Please note that the two wildtype strains on each plate carry different antibiotic markers for the selection of diploid clones with both mutant strains present on the same plate (1-ZeoR, 2-hphMX, 3-kanMX, 4-NatMX). (B) Mating of *ste2Δ* and *ste3Δ* strains. (C) Mating of heterothallic *dic1-2Δ matΔ* strains. (D) Mating of heterothallic *dic1-2Δ matΔ* strains with the unmodified *dic1-2Δ* strains.

**Table S1** p-values for comparison of expression levels in mating medium

| gene \ strains | <i>dic1-2Δ(α)/dic1-2Δ(a)</i> | <i>dic1-2Δ(α)/wt</i> | <i>dic1-2Δ(a)/wt</i> |
|----------------|------------------------------|----------------------|----------------------|
| <i>MATa1</i>   | 0.0018                       | 0.0235               | 0.1377               |
| <i>MATa2</i>   | 0.0061                       | 0.0212               | 0.0056               |
| <i>MATα1</i>   | 0.0057                       | 0.1714               | 0.0047               |
| <i>MATα2</i>   | 0.0001                       | 0.0935               | 0.0055               |
| <i>STE2</i>    | 0.0036                       | 0.0117               | 0.0003               |
| <i>STE3</i>    | 0.0037                       | 0.0043               | 0.0019               |

All p-values were calculated from three biological replicates using a Student's t-test.

**Table S2** p-values for comparison of expression levels in YPD vs. mating medium

| gene \ strain | <i>dic1-2Δ(α)</i> | <i>dic1-2Δ(a)</i> | wildtype |
|---------------|-------------------|-------------------|----------|
| <i>MATa1</i>  | 0.0356            | 0.0127            | 0.0460   |
| <i>MATa2</i>  | -                 | 0.0064            | 0.0209   |
| <i>MATα1</i>  | 0.0058            | -                 | 0.0047   |
| <i>MATα2</i>  | 0.0001            | -                 | 0.0058   |
| <i>STE2</i>   | -                 | 0.0036            | 0.0109   |
| <i>STE3</i>   | 0.0033            | 0.0074            | 0.0018   |

All p-values were calculated from three biological replicates using a Student's t-test. Values are not shown for comparisons in which transcript levels were extremely low in both conditions.

**Table S3** Relative *MAT* and *STE2* / *STE3* transcript levels in *dic1-2Δ matΔ* strains.

| strain            | <i>MATa1</i> |          |         | <i>MATa2</i> |          |         | <i>MATα1</i> |          |         | <i>MATα2</i> |          |         | <i>STE2</i> |          |         | <i>STE3</i> |          |         |
|-------------------|--------------|----------|---------|--------------|----------|---------|--------------|----------|---------|--------------|----------|---------|-------------|----------|---------|-------------|----------|---------|
|                   | fold change  | SD       | p-value | fold change  | SD       | p-value | fold change  | SD       | p-value | fold change  | SD       | p-value | fold change | SD       | p-value | fold change | SD       | p-value |
| <i>dic1-2Δ(a)</i> | <b>1.0</b>   | +/- 0.10 | -       | <b>1.0</b>   | +/- 0.16 | -       | 1.0          | +/- 0.08 | -       | 1.0          | +/- 0.31 | -       | <b>1.0</b>  | +/- 0.16 | -       | 1.0         | +/- 0.19 | -       |
| <i>mata1Δ(a)</i>  | -            | -        | -       | <b>1.16</b>  | +/- 0.15 | 0.1282  | 0.95         | +/- 0.23 | 0.7183  | 0.66         | +/- 0.17 | 0.0494  | <b>1.14</b> | +/- 0.44 | 0.7589  | 1.20        | +/- 0.26 | 0.2013  |
| <i>mata2Δ(a)</i>  | <b>1.76</b>  | +/- 0.05 | 0.0000  | -            | -        | -       | 0.60         | +/- 0.08 | 0.0001  | 0.67         | +/- 0.41 | 0.1669  | <b>0.01</b> | +/- 0.00 | 0.0000  | 0.19        | +/- 0.03 | 0.0000  |
| <i>matα1Δ(a)</i>  | <b>1.05</b>  | +/- 0.28 | 1.0000  | <b>1.27</b>  | +/- 0.33 | 0.2324  | -            | -        | -       | 6.01         | +/- 0.48 | 0.0000  | <b>1.91</b> | +/- 0.50 | 0.0049  | 1.12        | +/- 0.25 | 0.4547  |
| <i>matα2Δ(a)</i>  | <b>1.35</b>  | +/- 0.18 | 0.0022  | <b>1.10</b>  | +/- 0.29 | 0.6250  | 1.08         | +/- 0.04 | 0.0022  | -            | -        | -       | <b>1.40</b> | +/- 0.23 | 0.0056  | 2.02        | +/- 0.20 | 0.0000  |
| <i>dic1-2Δ(α)</i> | 1.0          | +/- 0.14 | -       | 1.0          | +/- 0.17 | 0.0596  | <b>1.0</b>   | +/- 0.21 | -       | <b>1.0</b>   | +/- 0.20 | -       | 1.0         | +/- 0.13 | -       | <b>1.0</b>  | +/- 0.22 | -       |
| <i>mata1Δ(α)</i>  | -            | -        | -       | 0.78         | +/- 0.20 | -       | <b>1.10</b>  | +/- 0.06 | 0.3423  | <b>1.25</b>  | +/- 0.15 | 0.0486  | 1.12        | +/- 0.16 | 0.2168  | <b>1.11</b> | +/- 0.07 | 0.3015  |
| <i>mata2Δ(α)</i>  | 1.37         | +/- 0.07 | 0.0045  | -            | -        | -       | <b>1.04</b>  | +/- 0.08 | 0.7193  | <b>1.12</b>  | +/- 0.07 | 0.2217  | 0.89        | +/- 0.14 | 0.2354  | <b>0.98</b> | +/- 0.10 | 0.8228  |
| <i>matα1Δ(α)</i>  | 0.75         | +/- 0.27 | 0.0724  | 0.44         | +/- 0.20 | 0.0045  | -            | -        | -       | <b>1.44</b>  | +/- 0.37 | 0.0339  | 1.03        | +/- 0.21 | 0.9094  | <b>0.01</b> | +/- 0.00 | 0.0000  |
| <i>matα2Δ(α)</i>  | 0.86         | +/- 0.16 | 0.1329  | 0.94         | +/- 0.26 | 0.5183  | <b>0.46</b>  | +/- 0.08 | 0.0000  | -            | -        | -       | 1.10        | +/- 0.06 | 0.1536  | <b>1.00</b> | +/- 0.06 | 0.9808  |

Changes in *MAT* and *STE2* / *STE3* transcript levels in the different *dic1-2Δ matΔ* strains under mating conditions were analyzed by quantitative PCR. Gene expression was normalized to *ACT1* and is given as fold change to the expression in the respective unmodified *dic1-2Δ* strain. Data was analyzed using the  $\Delta\Delta C_T$  method and fold changes were calculated as  $2^{-\Delta\Delta C_T}$ . Fold change values of highly expressed genes transcribed from the active *MAT* locus are indicated in bold. P-values were calculated using a Student's t-test.

**FIG S2** Generation of split marker cassettes for gene deletions

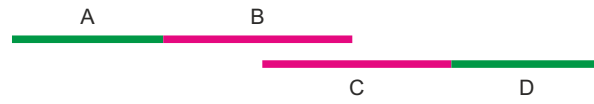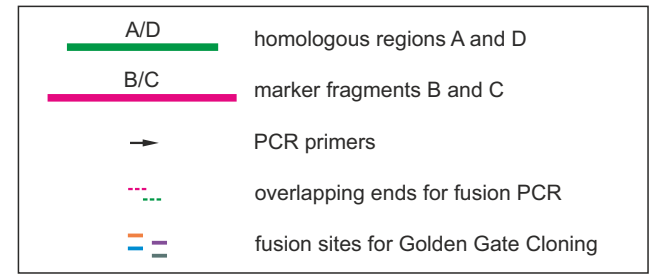

1. PCR amplification of fragments introducing overlapping ends

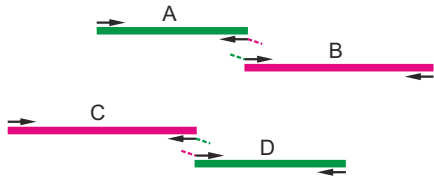

2. fusion PCR to generate split marker cassettes

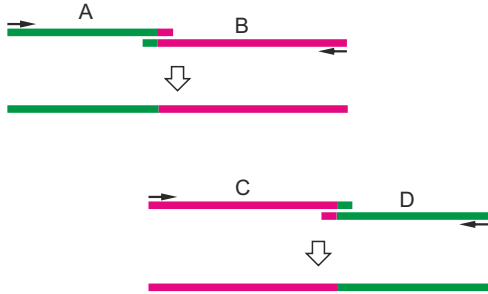

1. PCR amplification of fragments with fusion sites for Golden Gate Cloning

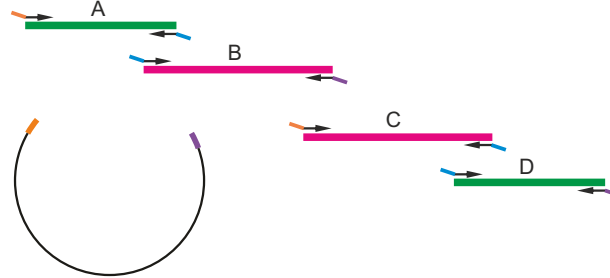

2. Assembly into two separate BB3 vectors

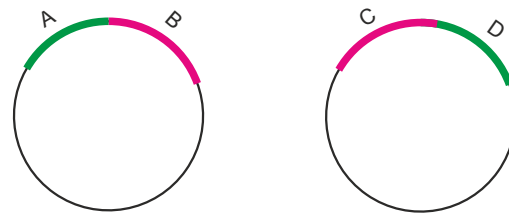

3. PCR amplification of split marker cassettes

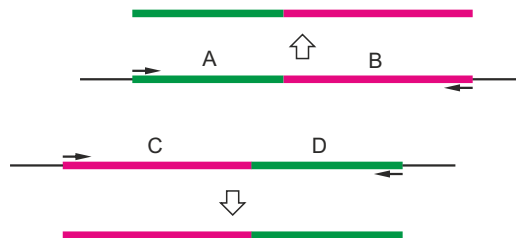

1. PCR amplification of fragments with fusion sites for Golden Gate Cloning

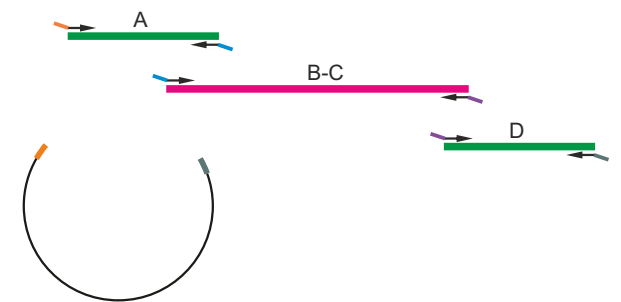

2. Assembly into one BB3 vector

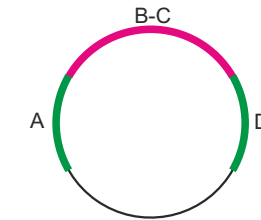

3. PCR amplification of split marker cassettes

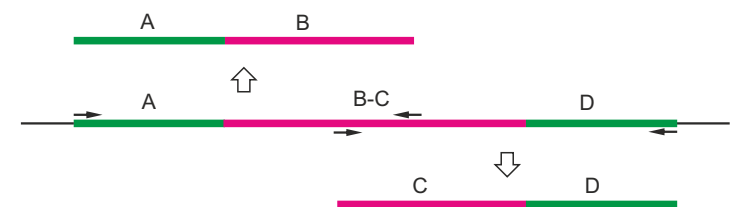

**FIG S2** Schematic of different strategies for the generation of the split-marker knockout cassettes. Generally, the knockout cassettes consisted of the homologous region for genomic integration (fragment A + D shown in green) and two halves of an antibiotic resistance marker with overlapping ends of around 440 bp (B + C shown in magenta). In the first approach, the separate fragments were amplified by PCR introducing small overlapping sequences and the final cassettes were generated by a second fusion PCR step. For the two remaining strategies, the fragments were introduced into plasmid vectors by Golden Gate Cloning. PCR amplified fragments carrying the required fusion sites were either introduced into separate vectors for the two halves of the split marker cassette or cloned as the full knockout cassette containing the whole marker sequence. In both cases the final split-marker fragments were amplified by PCR using the purified vectors as templates.

**Table S4** List of primers used in this study.

| <b>knockout cassettes assembled by fusion PCR of A-B and C-D</b>                                  |                                        |                                          |
|---------------------------------------------------------------------------------------------------|----------------------------------------|------------------------------------------|
| <i>MATa1</i>                                                                                      | homologous region A                    | AACTTGCTCTCCTCGATTTG                     |
|                                                                                                   |                                        | GTTGTCGACCTGCAGCGTACCTTGGGTGAGATGTGCGT   |
|                                                                                                   | marker fragment B                      | ACGCACATCTGACCAAGGTACGCTGCAGGTCGACAAC    |
|                                                                                                   |                                        | CTGCTCGCCGATCTCGGTC                      |
|                                                                                                   | marker fragment C                      | TGACCAGTGCCGTTCCGG                       |
|                                                                                                   |                                        | TTACGTTATGGATGGGACTAGTGGATCTGATATCACCTA  |
|                                                                                                   | homologous region D                    | TAGGTGATATCAGATCCACTAGTCCCATCCATAACGTAAC |
|                                                                                                   |                                        | CCGTGATGTAGCCGAAGAG                      |
| <i>MATa1+2</i>                                                                                    | homologous region A                    | GTGATGTAGCCGAAGAGT                       |
|                                                                                                   |                                        | GTTGTCGACCTGCAGCGTACATCCTGGAATGAGCTACT   |
|                                                                                                   | marker fragment B                      | AGTAGCTCATTCCAGGATGTACGCTGCAGGTCGACAAC   |
|                                                                                                   |                                        | CGGTGAGAATGGCAAAGCTTATG                  |
|                                                                                                   | marker fragment C                      | AAGCCCGATGCGCCAGAGTTG                    |
|                                                                                                   |                                        | CAGTTTTCATGTCTCAAGCGAGTGGATCTGATATCACCTA |
|                                                                                                   | homologous region D                    | TAGGTGATATCAGATCCACTCGCTTGAGACATGAAAAGT  |
|                                                                                                   |                                        | CCAGCCAAACAAACAATC                       |
| <b>knockout cassettes assembled into 2 different vectors by Golden Gate Cloning (A-B and C-D)</b> |                                        |                                          |
| <i>MATa2</i>                                                                                      | homologous region A (fusion sites A-B) | GGTCTCCGATCTTTTGGTATGGAGGTGCCG           |
|                                                                                                   |                                        | GGTCTCCCCGGACAACGTTTAGCTGCCTTC           |
|                                                                                                   | marker fragment B (fusion sites B-C)   | GGTCTCCCCGGAGTGGATCTGATATCACCTA          |
|                                                                                                   |                                        | GGTCTCCAATTAGACCTGCCTGAAACCGAACTGC       |
|                                                                                                   | marker fragment C (fusion sites A-B)   | GGTCTCCGATCAGATGTTGGCGACCTCGTATTG        |
|                                                                                                   |                                        | GGTCTCCCCGGTACGCTGCAGGTCGACAAC           |
|                                                                                                   | homologous region D (fusion sites B-C) | GGTCTCCCCGGAATTCTATCCATCAGACCTG          |
|                                                                                                   |                                        | GGTCTCCAATTTGCCTGTTGCTTCTATACT           |
| <i>MATa1</i>                                                                                      | homologous region A (fusion sites A-B) | GGTCTCCGATCGCTCAGCGACCAAGAAAA            |
|                                                                                                   |                                        | GGTCTCCCCGGAGCTACTCAGCACTAGAAA           |
|                                                                                                   | marker fragment B (fusion sites B-C)   | GGTCTCCCCGGTACGCTGCAGGTCGACAAC           |
|                                                                                                   |                                        | GGTCTCCAATTCGGTGAGAATGGCAAAGCTTATG       |
|                                                                                                   | marker fragment C (fusion sites A-B)   | GATAGGTCTCCGATCAAGCCCGATGCGCCAGAGTTG     |
|                                                                                                   |                                        | GATAGGTCTCCCCGGAGTGGATCTGATATCACCTA      |
|                                                                                                   | homologous region D (fusion sites B-C) | GATAGGTCTCCCCGGTATCTATCACATGCACGCAC      |
|                                                                                                   |                                        | GATAGGTCTCCAATTTCCATCCTTTATTGCGCT        |
| <i>MATa2</i>                                                                                      | homologous region A (fusion sites A-B) | GGTCTCCGATCCTCTACAGAATGCGCGAA            |
|                                                                                                   |                                        | GGTCTCCCCGGACAGAGCTACTTCAAGCA            |
|                                                                                                   | marker fragment B (fusion sites B-C)   | GGTCTCCCCGGTACGCTGCAGGTCGACAAC           |
|                                                                                                   |                                        | GGTCTCCAATTTGCGTTGACGTTGGTGAC            |
|                                                                                                   | marker fragment C (fusion sites A-B)   | GGTCTCCGATCGTCTTACCACCGACACC             |
|                                                                                                   |                                        | GGTCTCCCCGGAGTGGATCTGATATCACCTA          |
|                                                                                                   | homologous region D (fusion sites B-C) | GGTCTCCCCGGAAGTATAAGAATCGCGG             |
|                                                                                                   |                                        | GGTCTCCAATTCAGCCAAACAAACACAA             |
| <b>knockout cassettes assembled into 1 vector by Golden Gate Cloning (A-D)</b>                    |                                        |                                          |
| <i>MATa1+2</i>                                                                                    | homologous region A (fusion sites A-B) | GATAGGTCTCCGATCTTTTGGTATGGAGGTGCCG       |
|                                                                                                   |                                        | GATAGGTCTCCCCGGACAACGTTTAGCTGCCTTC       |



|                                                                                |                                                              |                                            |
|--------------------------------------------------------------------------------|--------------------------------------------------------------|--------------------------------------------|
|                                                                                | marker fragment B-C (fusion sites B-C)                       | GATAGGTCTCCCCGGGTACGCTGCAGGTCGACAAC        |
|                                                                                |                                                              | GATAGGTCTCCAATTAGTGGATCTGATATCACCTA        |
|                                                                                | homologous region D (fusion sites C-D)                       | GATAGGTCTCCAATTAGTCCCATCCATAACGTAAG        |
|                                                                                |                                                              | GATAGGTCTCCAGCTCCGTGATGTAGCCGAAGAG         |
| <b>STE2</b>                                                                    | homologous region A (fusion sites A-B)                       | GATAGGTCTCCGATCAAATCTTCAGCAAGAACGG         |
|                                                                                |                                                              | GATAGGTCTCCCCGGGCAGGCAATAATCAAACGG         |
|                                                                                | marker fragment B-C (fusion sites B-C)                       | GATAGGTCTCCCCGGGTACGCTGCAGGTCGACAAC        |
|                                                                                |                                                              | GATAGGTCTCCAATTAGTGGATCTGATATCACCTA        |
|                                                                                | homologous region D (fusion sites C-D)                       | GATAGGTCTCCAATTGCACGTTCACTTCTCTTTACT       |
|                                                                                |                                                              | GATAGGTCTCCAGCTACTGAAACACCAAAAGATCCC       |
| <b>STE3</b>                                                                    | homologous region A (fusion sites A-B)                       | GATAGGTCTCCGATCGGAAGCCAAGGGGAATGA          |
|                                                                                |                                                              | GATAGGTCTCCCCGGGATAAAGTGTGACGCGGA          |
|                                                                                | marker fragment B-C (fusion sites B-C)                       | GATAGGTCTCCCCGGGTACGCTGCAGGTCGACAAC        |
|                                                                                |                                                              | GATAGGTCTCCAATTAGTGGATCTGATATCACCTA        |
|                                                                                | homologous region D (fusion sites C-D)                       | GATAGGTCTCCAATTAACAGGCCAAACATGAAGA         |
|                                                                                |                                                              | GATAGGTCTCCAGCTCTCGCATTAAACCATTTTCTCC      |
| <b>DIC1-2</b>                                                                  | homologous region A (fusion sites A-B)                       | GATAGGTCTCCGATCTGAAAAGATTTGGGTTGCG         |
|                                                                                |                                                              | GATAGGTCTCCCCGGGATGATGTTCTGGTTTACT         |
|                                                                                | marker fragment B-C (fusion sites B-C)                       | GATAGGTCTCCCCGGGTACGCTGCAGGTCGACAAC        |
|                                                                                |                                                              | GATAGGTCTCCAATTAGTGGATCTGATATCACCTA        |
|                                                                                | homologous region D (fusion sites C-D)                       | GATAGGTCTCCAATTCATCATCGTTTTCCACAAG         |
|                                                                                |                                                              | GATAGGTCTCCGAGACTCTGGAGGTATATG             |
|                                                                                |                                                              | GATAGGTCTCCTCTCAAGGAGCAATCATAACC           |
|                                                                                |                                                              | GATAGGTCTCCAGCTTCCCAAATACGCACACAG          |
| <b>MATa1+2 integration</b>                                                     | homologous region A (fusion sites A-B)                       | GATAGGTCTCCGATCTAACGGGGATCATGTATCGG        |
|                                                                                |                                                              | GATAGGTCTCCCCGGTTATTTCATCCGCATGGTATCCA     |
|                                                                                | marker fragment B-C (fusion sites B-F)                       | GATAGGTCTCCCCGGGTACGCTGCAGGTCGACAAC        |
|                                                                                |                                                              | GATAGGTCTCCAAGCAGTGGATCTGATATCACCTA        |
|                                                                                | <i>MATa1+2</i> (fusion sites F-C)                            | GATAGGTCTCCGCTTGTAAGTGAATGAGTTACGTTACG     |
|                                                                                |                                                              | GATAGGTCTCCAATTCATTTAGTATTTGACGCTACAGG     |
|                                                                                | homologous region D (fusion sites C-D)                       | GATAGGTCTCCAATTCATCATCGTTTTCCACAAG         |
|                                                                                |                                                              | GATAGGTCTCCGAGACTCTGGAGGTATATG             |
|                                                                                |                                                              | GATAGGTCTCCTCTCAAGGAGCAATCATAACC           |
|                                                                                |                                                              | GATAGGTCTCCAGCTTCCCAAATACGCACACAG          |
| <b>MATa1+2 integration</b>                                                     | homologous region A and <i>MATa1+2</i><br>(fusion sites A-B) | GATAGGTCTCCGATCTTTTGGTATGGAGGTGCCG         |
|                                                                                |                                                              | GATAGGTCTCCCCGGGCAGATTATTAATGAAGTATAGAAACC |
|                                                                                | marker fragment B-C (fusion sites B-C)                       | GATAGGTCTCCCCGGGTACGCTGCAGGTCGACAAC        |
|                                                                                |                                                              | GATAGGTCTCCAATTAGTGGATCTGATATCACCTA        |
|                                                                                | homologous region D (fusion sites C-D)                       | GATAGGTCTCCAATTTTACTTTCGTCGTCATGGT         |
|                                                                                |                                                              | GATAGGTCTCCAGCTTAACGGGGATCATGTATCGG        |
| <b>primers for cloning of homology templates for Cas9 mediated integration</b> |                                                              |                                            |
| <b>MATa1</b>                                                                   | homologous region A (fusion sites A-B)                       | GATAGGTCTCCGATCAAGGCAGCTAAACGTTGT          |
|                                                                                |                                                              | GATAGGTCTCCCCGGTGCCAAGACTTGTGTTTCT         |
|                                                                                | marker fragment B-C (fusion sites B-C)                       | GATAGGTCTCCCCGGGTACGCTGCAGGTCGACAAC        |
|                                                                                |                                                              | GATAGGTCTCCAATTAGTGGATCTGATATCACCTA        |
|                                                                                | homologous region D (fusion sites C-D)                       | GATAGGTCTCCAATTTTACACAAAGCCAGCAAC          |

|                                                                   |                                        |                                                                   |
|-------------------------------------------------------------------|----------------------------------------|-------------------------------------------------------------------|
|                                                                   |                                        | GATAGGTCTCCAGCTATGGGACTGAGCTTGAAG                                 |
| <b>MATa2</b>                                                      | homologous region A (fusion sites A-B) | GATAGGTCTCCGATCAAGGCAGCTAAACGTTGT                                 |
|                                                                   |                                        | GATAGGTCTCCCCGGTGCCAAGACTTGTGTTTCT                                |
|                                                                   | marker fragment B-C (fusion sites B-C) | GATAGGTCTCCCCGGTACGCTGCAGGTCGACAAC                                |
|                                                                   |                                        | GATAGGTCTCCAATTAGTGGATCTGATATCACCTA                               |
|                                                                   | homologous region D (fusion sites C-D) | GATAGGTCTCCAATTCTAACTAGTTATCATACTTCTGTCCTTCTACC                   |
|                                                                   |                                        | GATAGGTCTCCAGCTTGTTTTTCCCGAATAGGCT                                |
| <b>MATa1</b>                                                      | homologous region A (fusion sites A-B) | GATAGGTCTCCGATCATTCTAGTGTGAGTAGC                                  |
|                                                                   |                                        | GATAGGTCTCCCCGGCCTTTCAAGTGTTCCTCAA                                |
|                                                                   | marker fragment B-C (fusion sites B-C) | GATAGGTCTCCCCGGTACGCTGCAGGTCGACAAC                                |
|                                                                   |                                        | GATAGGTCTCCAATTAGTGGATCTGATATCACCTA                               |
|                                                                   | homologous region D (fusion sites C-D) | GATAGGTCTCCAATTCTAACTAGTTAACTCCGATTGCCTTTTGT                      |
|                                                                   |                                        | GATAGGTCTCCAGCTGAATGCTCAAGAACGACG                                 |
| <b>MATa2</b>                                                      | homologous region A (fusion sites A-B) | GATAGGTCTCCGATCACTCCGATTGCCTTTTG                                  |
|                                                                   |                                        | GATAGGTCTCCCCGGGAGAAAAAGAAGGTTGCC                                 |
|                                                                   | marker fragment B-C (fusion sites B-C) | GATAGGTCTCCCCGGTACGCTGCAGGTCGACAAC                                |
|                                                                   |                                        | GATAGGTCTCCAATTAGTGGATCTGATATCACCTA                               |
|                                                                   | homologous region D (fusion sites C-D) | GATAGGTCTCCAATTTTCCAACATTAAGCGATCG                                |
|                                                                   |                                        | GATAGGTCTCCTAACTAGTTAGAGAATCTTGCAAGGGATATC                        |
|                                                                   |                                        | GATAGGTCTCCGTTACATCAGAGTTTTGTGCACA                                |
|                                                                   |                                        | GATAGGTCTCCAGCTGCTACAGAAAACCGCGA                                  |
| <b>primers for assembly of gRNAs by fusion PCR</b>                |                                        |                                                                   |
| <i>for all gRNAs</i>                                              | CR_rib_1_gRNAall_rev                   | CGCCATGCCAAGCATGTTGCCAGCCGGCGCCAGCGAGGAGGCTGG<br>GACCATGCCGGCC    |
|                                                                   | CR_rib_2_gRNAall_rev                   | GATAGGTCTCCAAGCGTCCAAAGCTGTCCCATTCGCCATGCCGAAGCA<br>TGTTGCCAGCC   |
|                                                                   | CR_rib_3_gRNAall_rev                   | AGGCTGGGACCATGCCGGCCAAAAGCACCGACTCGGTGCCACTTTTTTC<br>AAGTTGATAACG |
|                                                                   | CR_rib_4_gRNAall_fwd                   | ACTTTTTCAAGTTGATAACGGACTAGCCTTATTTAACTTGCTATTTCTA<br>GCTCTAAAAC   |
| <b>MATa1</b>                                                      | MATa1_gRNA_1_fwd                       | GATAGGTCTCCCATGATGATACTGATGAGTCCGTGAGGACGAAACGA<br>GTAAGCTCGTCTA  |
|                                                                   | MATa1_gRNA_2_fwd                       | AAACGAGTAAGCTCGTCTATCATGGACAATAGGCATGGTTTTAGAGCT<br>AGAAATAGCAAG  |
| <b>MATa2</b>                                                      | MATa2_gRNA_1_fwd                       | GATAGGTCTCCCATGATTCTGCTGATGAGTCCGTGAGGACGAAACGAG<br>TAAGCTCGTCCA  |
|                                                                   | MATa2_gRNA_2_fwd                       | AAACGAGTAAGCTCGTCCAGAATCAAAGGATGACGATGTTTTAGAGCT<br>AGAAATAGCAAG  |
| <b>MATa1</b>                                                      | MATalpha1_gRNA1_fwd                    | GATAGGTCTCCCATGTTGCGGCTGATGAGTCCGTGAGGACGAAACGAG<br>TAAGCTCGTCCC  |
|                                                                   | MATalpha1_gRNA2_fwd                    | AAACGAGTAAGCTCGTCCGCAACCCAAATCTTTCAAGTTTTAGAGCT<br>AGAAATAGCAAG   |
| <b>MATa2</b>                                                      | MATalpha2_gRNA_1_fwd                   | GATAGGTCTCCCATGTTTCTCTGATGAGTCCGTGAGGACGAAACGAG<br>TAAGCTCGTCCA   |
|                                                                   | MATalpha2_gRNA_2_fwd                   | AAACGAGTAAGCTCGTCCGAGAAAAAGAAGGTTGCCAAGTTTTAGAGCT<br>AGAAATAGCAAG |
| <b>primers for cassette amplification and integration control</b> |                                        |                                                                   |
| <b>MATa1</b>                                                      | MATa1_control_fwd                      | TGTAAGAGGAGAGTGGAAATTG                                            |
|                                                                   | MATa1_control_rev                      | AGGGAGTCGTAAGATTGG                                                |

|                            |                                        |                           |
|----------------------------|----------------------------------------|---------------------------|
| <b>MATa2</b>               | MATa2_ampl_fwd                         | TTTTGGTATGGAGGTGCCG       |
|                            | HphMX_rev                              | AGATGTTGGCGACCTCGTATTG    |
|                            | HphMX_fwd                              | AGACCTGCCTGAAACCGAACTGC   |
|                            | MATa2_ampl_rev                         | TGCCTGTTGCTTCTATACT       |
|                            | MATa2_control_fwd                      | CAATCCTCCATGACTCAGA       |
|                            | MATa2_control_rev                      | ATAACGAGATGACTGACGG       |
| <b>MATa1+2</b>             | MATa12_ampl_fwd                        | TTTTGGTATGGAGGTGCCG       |
|                            | Zeo_rev                                | CTGCTCGCCGATCTCGGTC       |
|                            | Zeo_fwd                                | TGACCAGTGCCGTTCCGG        |
|                            | MATa12_ampl_rev                        | CCGTGATGTAGCCGAAGAG       |
|                            | MATa12_control_fwd = Zeo_fwd           | TGACCAGTGCCGTTCCGG        |
|                            | MATa12_control_rev = MATa1_control_rev | AGGGAGTCGTAAGATTGG        |
| <b>MATa1</b>               | MATa1_ampl_fwd                         | GCTCAGCGACCAAGAAAA        |
|                            | KanMX_rev                              | CGGTGAGAATGGCAAAAAGCTTATG |
|                            | KanMX_fwd                              | AAGCCCGATGCGCCAGAGTTG     |
|                            | MATa1_ampl_rev                         | TTCCATCCTTTATTTCGCCT      |
|                            | MATa1_control_fwd                      | GTGATGTAGCCGAAGAGT        |
|                            | MATa1_control_rev                      | AGAATGCTCAAGAACGAC        |
| <b>MATa2</b>               | MATa2_ampl_fwd                         | CTCTACAGAATGCGCGAA        |
|                            | NatMX_rev                              | TGCGTTGACGTTGGTGAC        |
|                            | NatMX_fwd                              | GTCCTTCACCACCGACACC       |
|                            | MATa2_ampl_rev                         | CCAGCCAAACAAACACAA        |
|                            | MATa2_control_fwd                      | CTAGTGCGAGGAGTTTCT        |
|                            | MATa2_control_rev                      | CTTCTTCTCGTTTCCCACC       |
| <b>MATa1+2</b>             | MATa12_control_fwd                     | GTAAGGGAGTCGTAAGATTGG     |
|                            | MATa12_control_rev                     | AGTGCAGGAGGAAACAAG        |
| <b>STE2</b>                | STE2_ampl_fwd                          | AAATCTTCAGCAAGAACGG       |
|                            | KanMX_rev                              | CGGTGAGAATGGCAAAAAGCTTATG |
|                            | KanMX_fwd                              | AAGCCCGATGCGCCAGAGTTG     |
|                            | STE2_ampl_rev                          | ACTGAAAACACAAAAGATCCC     |
|                            | STE2_control_fwd                       | CGACAGAAGGGAAGCAAG        |
|                            | STE2_control_rev                       | AAAAGAGATAACGTCCAGCG      |
| <b>STE3</b>                | STE3_ampl_fwd                          | GGAAGCCAAGGGGAATGA        |
|                            | NatMX_rev                              | TGCGTTGACGTTGGTGAC        |
|                            | NatMX_fwd                              | GTCCTTCACCACCGACACC       |
|                            | STE3_ampl_rev                          | CTCGCATTAACCATTTTCTCC     |
|                            | STE3_control_fwd                       | CCAAAATCCACCTTGATCCC      |
|                            | STE3_control_rev                       | TACAAGACTCACCTTCTGACC     |
| <b>DIC1-2</b>              | DIC1_ampl_fwd                          | TGAAAAGATTTGGGTTGCG       |
|                            | KanMX_rev                              | CGGTGAGAATGGCAAAAAGCTTATG |
|                            | KanMX_fwd                              | AAGCCCGATGCGCCAGAGTTG     |
|                            | DIC1_ampl_rev                          | TCCCAAATACGCACACAG        |
|                            | DIC1_control_fwd                       | CTGTGGGCGTATTGGGAA        |
|                            | DIC1_control_rev                       | GTGTCTCGAGTTTGTGTAGT      |
| <b>MATa1+2 integration</b> | MATa12_integ_ampl_fwd                  | TAACGGGGATCATGTATCGG      |
|                            | NatMX_rev                              | TGCGTTGACGTTGGTGAC        |
|                            | NatMX_fwd                              | GTCCTTCACCACCGACACC       |

|                                              |                                                         |                       |
|----------------------------------------------|---------------------------------------------------------|-----------------------|
|                                              | MAT $\alpha$ 12_integ_ampl_fwd = DIC1_ampl_rev          | TCCCAAATACGCACACAG    |
|                                              | MAT $\alpha$ 12_integ_control_fwd                       | AACGCAGGAGAACCGTAAAC  |
|                                              | MAT $\alpha$ 12_integ_control_rev =<br>DIC1_control_rev | GTGTCTCGAGTTTTGTGTAGT |
| <b>MAT<math>\alpha</math>1+2 integration</b> | MAT $\alpha$ 12_integ_ampl_fwd                          | TTTTGGTATGGAGGTGCCG   |
|                                              | NatMX_rev                                               | TGCGTTGACGTTGGTGAC    |
|                                              | NatMX_fwd                                               | GTCCTTACCACCGACACC    |
|                                              | MAT $\alpha$ 12_integ_ampl_rev                          | TAACGGGGATCATGTATCGG  |
|                                              | MAT $\alpha$ 12_integ_control_fwd                       | GGAATAAAGCGTACTGGTG   |
|                                              | MAT $\alpha$ 12_integ_control_rev                       | GCTCTACAGAATGCGCGAA   |
| <b>primers for mating-type determination</b> |                                                         |                       |
| <b>MAT locus1</b>                            | MAT_locus1_preDIC1_fwd                                  | GCATCCAGCATAATTTAGATT |
|                                              | MAT_locus1_MAT $\alpha$ _rev                            | AACTCTGGGATCTTTGGA    |
|                                              | MAT_locus1_MAT $\alpha$ _rev                            | CGCTTGAGACATGAAAAC TG |

Fusion sites for Golden Gate Cloning are indicated in bold. Underlined characters indicate guide RNA sequences for CRISPR/Cas9 mediated homology-directed repair.
